# Supplementary material for: Additional crystalline structures of syndiotactic polystyrene composites with acetylated cyclodextrin
Source: Royal Society of Chemistry journal article supplement (doi:10.1039/d2py00390b), 2022-01-01
Supplement: d2py00390b1.pdf [file d2py00390b1.pdf]

## - Electronic Supplementary Information -

# Additional Crystalline Structure of Syndiotactic Polystyrene Composites with Acetylated Cyclodextrin

*Junsu Park,<sup>a</sup> Toshiki Nagamachi,<sup>b</sup> Takuma Aoyama,<sup>c</sup> Kazuto Hanada,<sup>a</sup>*

*Akira Harada,<sup>d</sup> Masanori Sera,<sup>b\*</sup> and Yoshinori Takashima<sup>a, c, f, g\*</sup>*

<sup>a</sup> Department of Macromolecular Science, Graduate School of Science, Osaka University,  
1-1 Machikaneyama, Toyonaka, Osaka 560-0043, Japan.

<sup>b</sup> Advanced Technology Research Laboratories, Idemitsu Kosan Co., Ltd.  
1280 Kamiizumi, Sodegaura, Chiba 299-0293, Japan.

<sup>c</sup> Performance Materials Laboratories, Idemitsu Kosan Co., Ltd.  
1-1 Anesaki-Kaigan, Ichihara, Chiba 299-0193, Japan.

<sup>d</sup> SANKEN (The Institute of Scientific and Industrial Research), Osaka University.  
8-1 Mihogaoka, Ibaraki, Osaka 567-0047, Japan.

<sup>e</sup> Project Research Centre for Fundamental Sciences, Graduate School of Science,  
Osaka University, 1-1 Machikaneyama, Toyonaka, Osaka 560-0043, Japan.

<sup>f</sup> Innovative Catalysis Science Division, Institute for Open and Transdisciplinary  
Research Initiatives (OTRI), Osaka University. 1-1 Yamadaoka, Suita, Osaka 565-0871, Japan.

<sup>g</sup> Institute for Advanced Co-Creation Studies, Osaka University,  
1-1 Yamadaoka, Suita, Osaka 565-0871, Japan.

## Content

|                                                                                      |            |
|--------------------------------------------------------------------------------------|------------|
| <b>1. Materials .....</b>                                                            | <b>S3</b>  |
| <b>2. Measurements .....</b>                                                         | <b>S3</b>  |
| <b>3. Preparation of sPS-MS composite film with acetylated CD (sPS-MS/AcCD).....</b> | <b>S4</b>  |
| <b>4. NMR spectra of mixtures of sPS-MS/AcCD.....</b>                                | <b>S5</b>  |
| <b>4. Comparison of peak areas of WAXS profiles of sPS-MS/AcCD .....</b>             | <b>S11</b> |
| <b>5. Thermal properties of sPS-MS/AcCD at second DSC scan .....</b>                 | <b>S12</b> |
| <b>References.....</b>                                                               | <b>S13</b> |

## 1. Materials

Deuterated chloroform was purchased from Sigma-Aldrich. 1,2,4-Trichlorobenzene and tetramethylsilane (TMS) were obtained from Tokyo Chemical Industry Co., Ltd. Syndiotactic polystyrene copolymerized with *p*-methyl styrene (sPS-MS) was kindly provided from Idemitsu Kosan Co., Ltd. Acetylated  $\alpha$ -cyclodextrin (Ac $\alpha$ CD), acetylated  $\beta$ -cyclodextrin (Ac $\beta$ CD) and acetylated  $\gamma$ -cyclodextrin (Ac $\gamma$ CD) were prepared according to previous report.<sup>1</sup>

## 2. Measurements

### NMR spectroscopy:

The <sup>1</sup>H NMR were recorded with a JEOL ECS-500 NMR spectrometer at 23 °C. The chemical shifts are referenced to the signal of TMS ( $\delta = 0$  ppm for <sup>1</sup>H NMR). 15.6 mg of sPS-MS and 303 mg of Ac $\beta$ CD were dissolved in respective 3 mL of CDCl<sub>3</sub> (0.05 M each). Subsequently, two solutions were mixed with different volume ratios to result in 500  $\mu$ L solutions (0/100, 10/90, 20/80, 30/70, 40/60, 50/50, 60/40, 70/30, 80/20, 90/10, and 100/0). Finally, 1  $\mu$ L of TMS was added to each mixed solution. For Ac $\alpha$ CD and Ac $\gamma$ CD mixtures, 130 mg of Ac $\alpha$ CD and 173 mg of Ac $\gamma$ CD were dissolved in respective 1.5 mL of CDCl<sub>3</sub> (0.05 M). Each solution was mixed with the sPS-MS solution to result in 600  $\mu$ L solutions with various volume ratios (0/100, 30/70, 50/50, 70/30, and 100/0).

### Wide angle X-ray scattering (WAXS) measurement:

Internal structures of films were determined by WAXS at BL19B2 beam line in SPring-8, Nishi-harima, Japan. The power of the incident X-ray beams was 18 keV. The sample-to-detector lengths for WAXS was 100 mm. The scattering angle in the WAXS measurements was expressed as 2 theta.

### Differential scanning calorimeter (DSC) measurements:

The thermal behaviours of the sPS-MS composites were determined by differential scanning calorimeter (Hitachi High-Technologies Corporation, DSC7020 System). On the first scan, samples were cooled to 0 °C at the rate of 10 °C/min and held for 5 minutes heated to 300 °C at the same rate. The second scans were carried out repeating the same processes.

### 3. Preparation of sPS-MS composite film with acetylated CD (sPS-MS/AcCD)

**Table S1.** Amount of sPS-MS and Ac $\alpha$ CD for film preparation.

| sPS-MS weight ratio (wt%) | sPS-MS (mg) | Ac $\alpha$ CD (mg) | TCB (mL) |
|---------------------------|-------------|---------------------|----------|
| 100                       | 491         | -                   | 5        |
| 99                        | 510         | 4.8                 | 5        |
| 97                        | 497         | 15                  | 5        |
| 95                        | 510         | 26                  | 5        |

**Table S2.** Amount of sPS-MS and Ac $\beta$ CD for film preparation.

| sPS-MS weight ratio (wt%) | sPS-MS (mg) | Ac $\beta$ CD (mg) | TCB (mL) |
|---------------------------|-------------|--------------------|----------|
| 100                       | 491         | -                  | 5        |
| 99                        | 490         | 5.4                | 5        |
| 97                        | 501         | 15.2               | 5        |
| 95                        | 497         | 26.3               | 5        |

**Table S3.** Amount of sPS-MS and Ac $\gamma$ CD for film preparation

| sPS-MS weight ratio (wt%) | sPS-MS (mg) | Ac $\gamma$ CD (mg) | TCB (mL) |
|---------------------------|-------------|---------------------|----------|
| 100                       | 491         | -                   | 5        |
| 99                        | 503         | 7.3                 | 5        |
| 97                        | 487         | 15.9                | 5        |
| 95                        | 481         | 24.4                | 5        |

#### 4. NMR spectra of mixtures of sPS-MS/AcCD

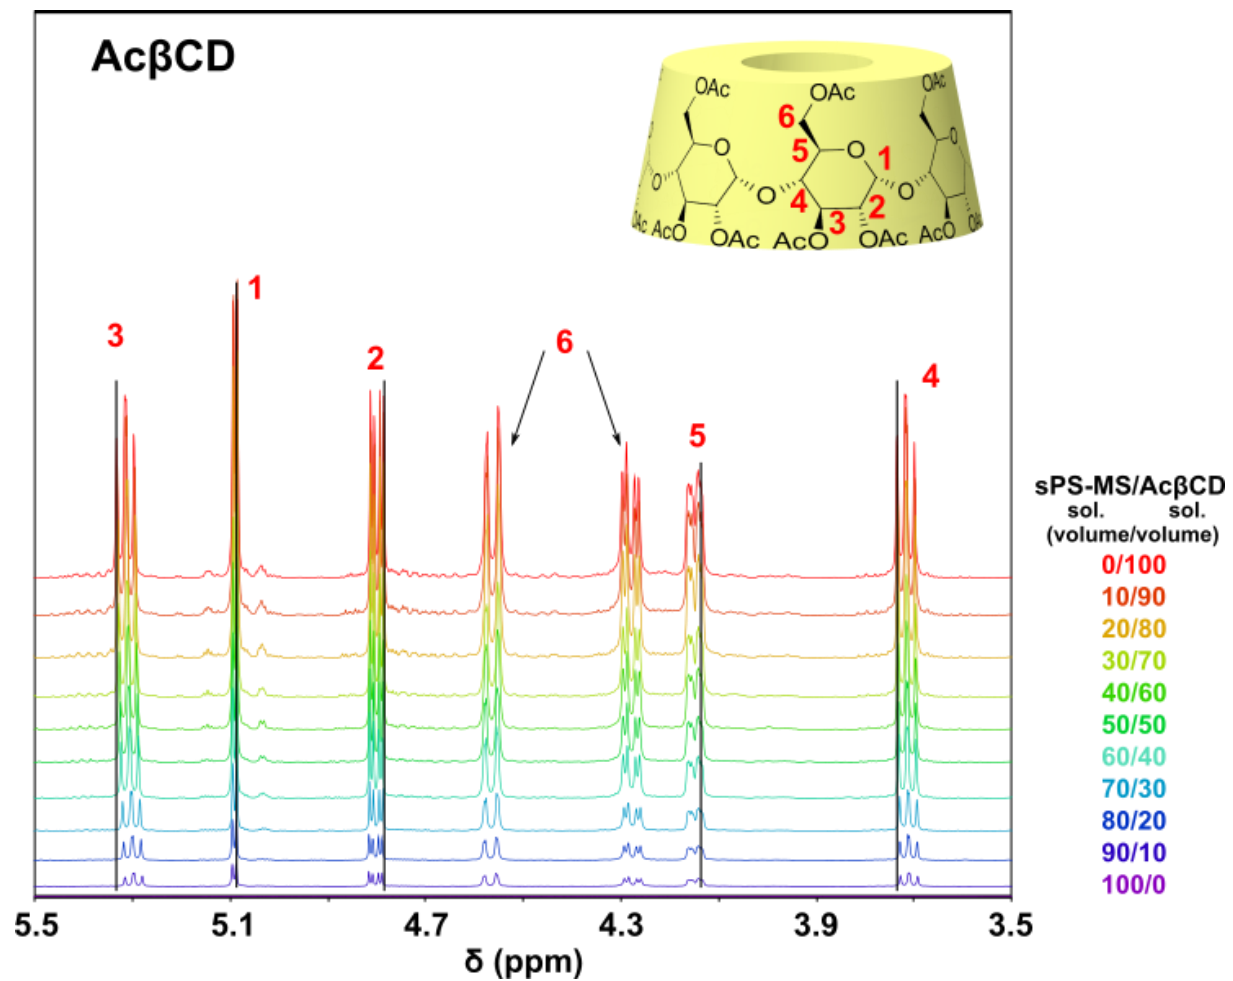

**Fig. S1.** Zoomed NMR spectra of the sPS-MS/Ac $\beta$ CD for chemical shifts of Ac $\beta$ CD with various mixing ratios (3.5-5.5 ppm).

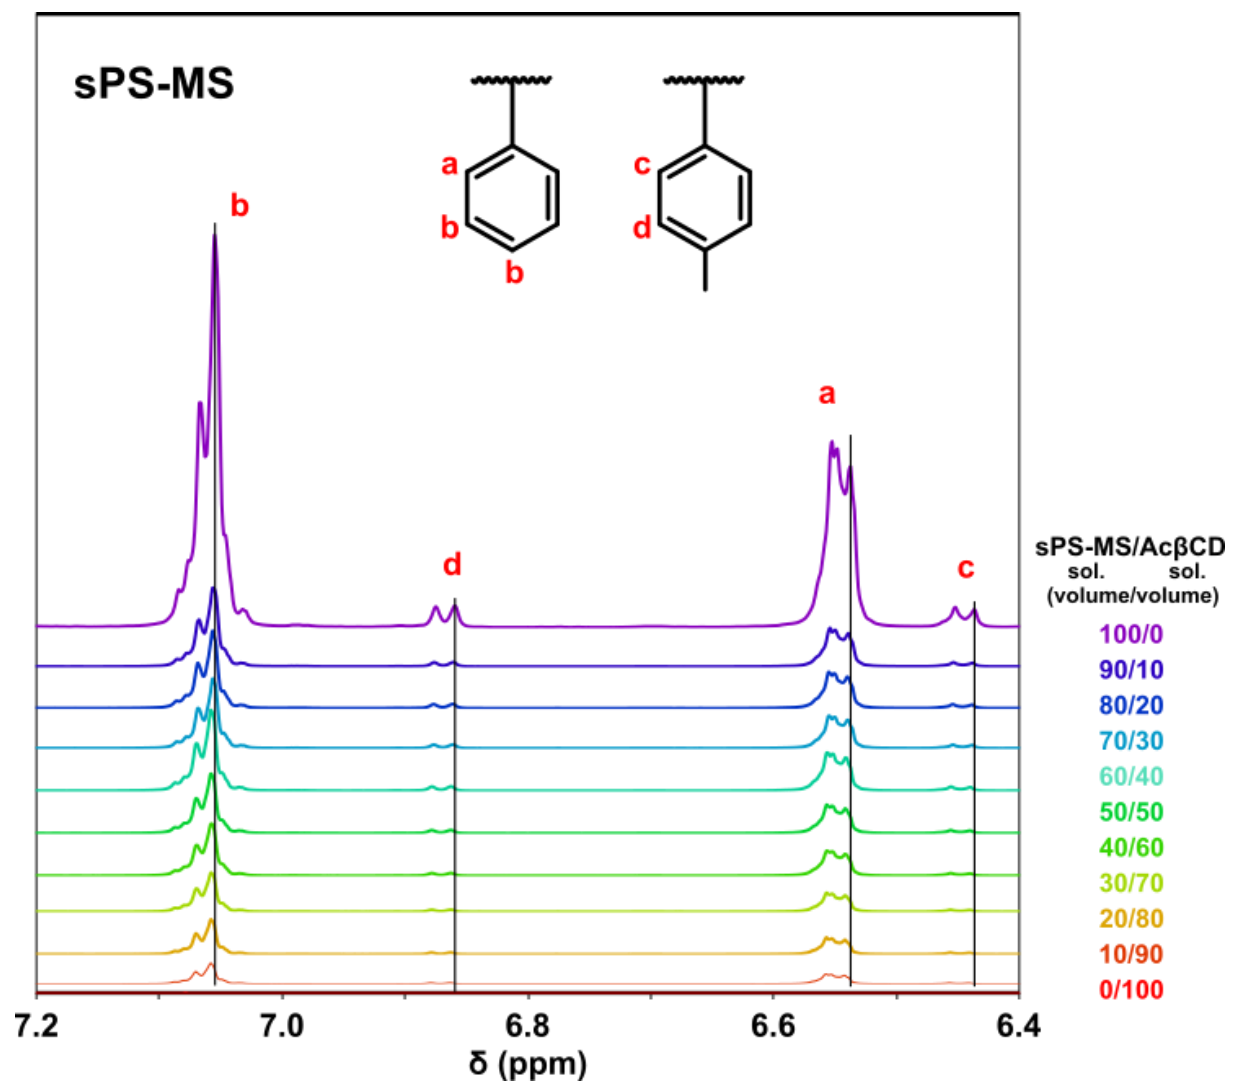

**Fig. S2.** Zoomed NMR spectra of the sPS-MS/Ac $\beta$ CD for chemical shifts of the benzene rings on sPS-MS with various mixing ratios (6.4-7.2 ppm).

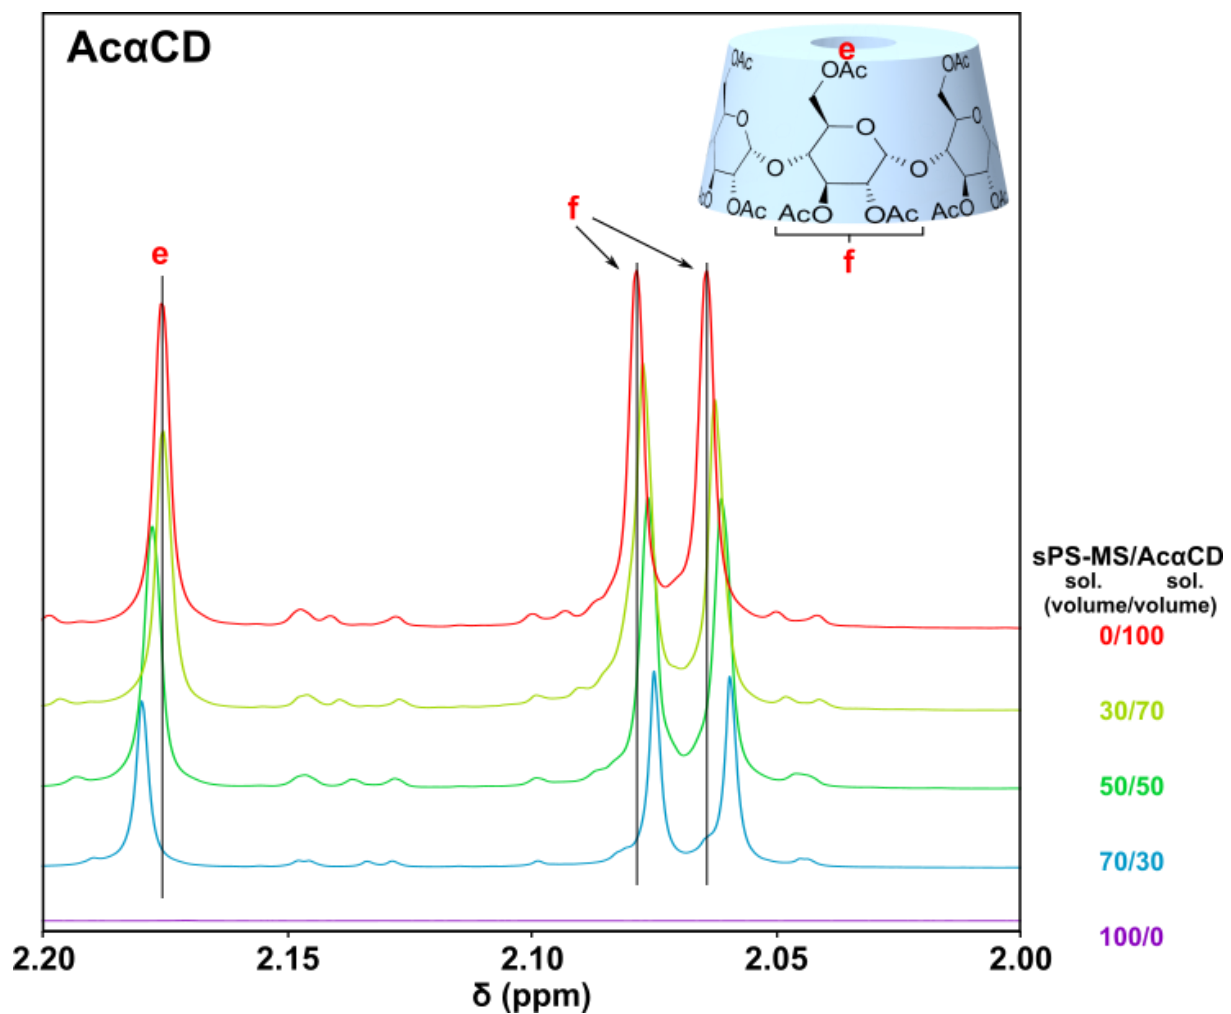

**Fig. S3.** Zoomed NMR spectra of the sPS-MS/A $\alpha$ CD for chemical shifts of A $\alpha$ CD with various mixing ratios (2.0-2.2 ppm). The acetyl groups on primary rim (e) downfield shifted and those on secondary rim (f) upfield shifted because of the deshielding and shielding effects, respectively.

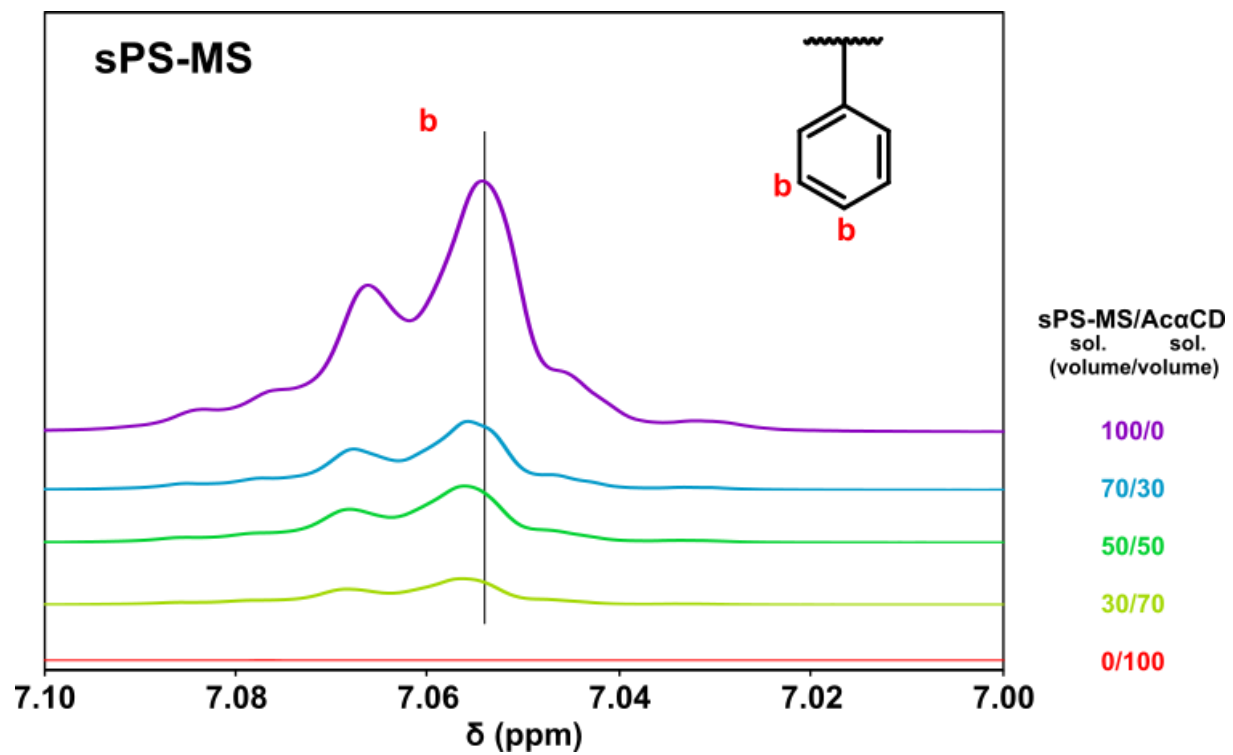

**Fig. S4.** Zoomed NMR spectra of the sPS-MS/Ac $\alpha$ CD for chemical shifts of the benzene rings on sPS-MS with various mixing ratios (7.0-7.1 ppm).

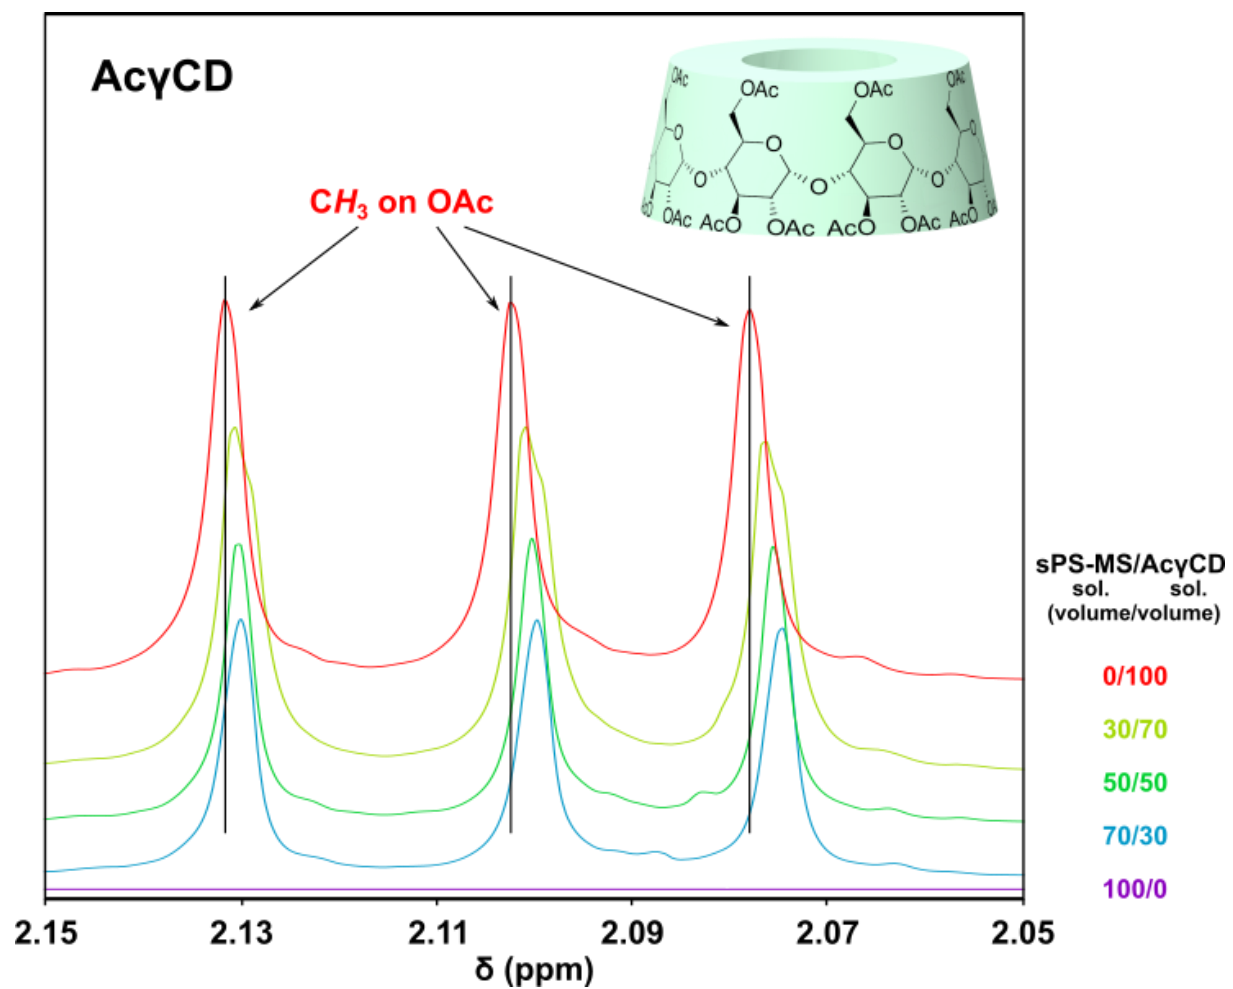

**Fig. S5.** Zoomed NMR spectra of the sPS-MS/AcyCD for chemical shifts of AcyCD with various mixing ratios (2.05-2.15 ppm). All acetyl groups upfield shifted because of the shielding effect.

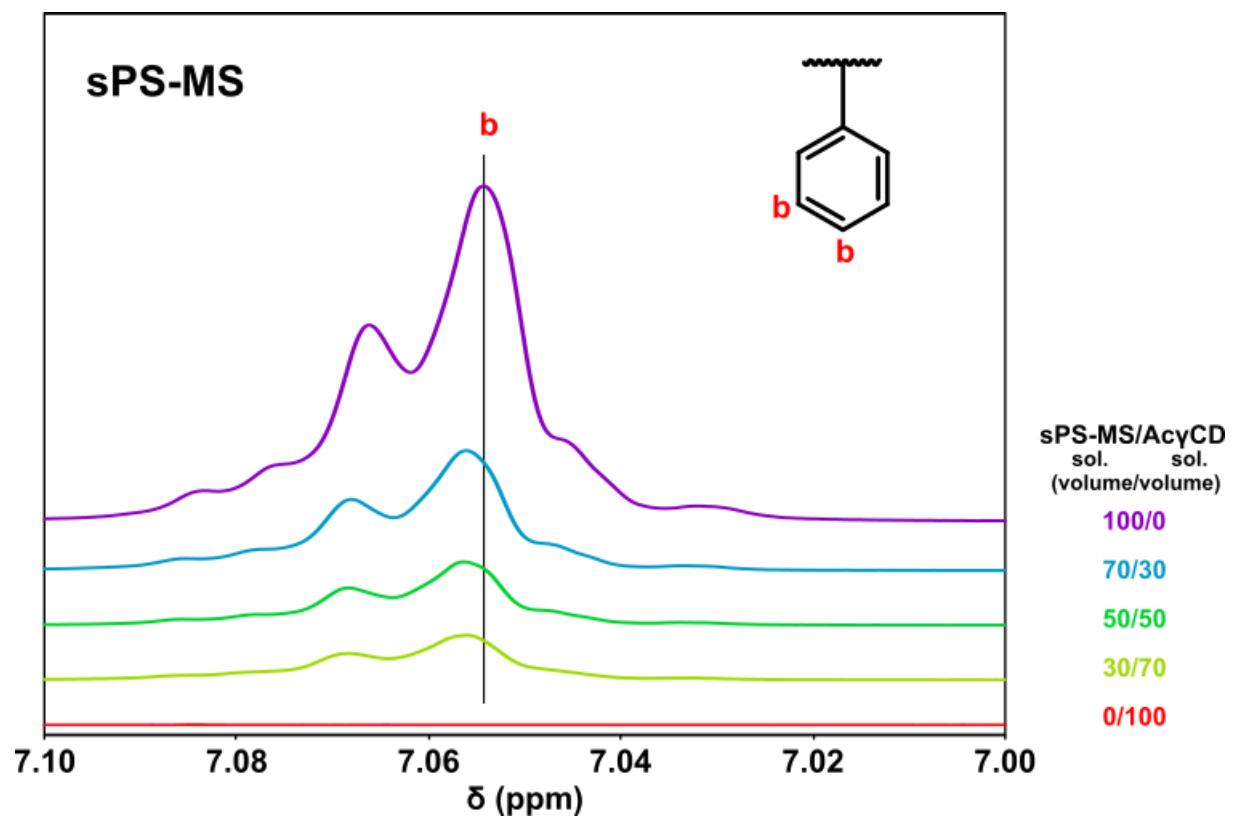

**Fig. S6.** Zoomed NMR spectra of the sPS-MS/AcyCD for chemical shifts of the benzene rings on sPS-MS with various mixing ratios (7.0-7.1 ppm).

#### 4. Comparison of peak areas of WAXS profiles of sPS-MS/AcCD

For peak area comparison the peaks at  $4.6^\circ$  were chosen as standard, as the peaks were almost constant in the experiments.

**Table S4.** Amount of sPS-MS and Ac $\alpha$ CD for film preparation.

| Types of AcCD  | Peak area at $2.7^\circ$ / Peak area at $4.6^\circ$ |       | Peak area at $5.4^\circ$ / Peak area at $4.6^\circ$ |       |
|----------------|-----------------------------------------------------|-------|-----------------------------------------------------|-------|
|                | 1 wt%                                               | 3 wt% | 1 wt%                                               | 3 wt% |
| Ac $\alpha$ CD | 0.21                                                | 0.26  | 0.16                                                | 0.20  |
| Ac $\beta$ CD  | 2.08                                                | 0.46  | 1.79                                                | 0.38  |
| Ac $\gamma$ CD | 1.13                                                | 1.60  | 0.95                                                | 1.39  |

## 5. Thermal properties of sPS-MS/AcCD at second DSC scan

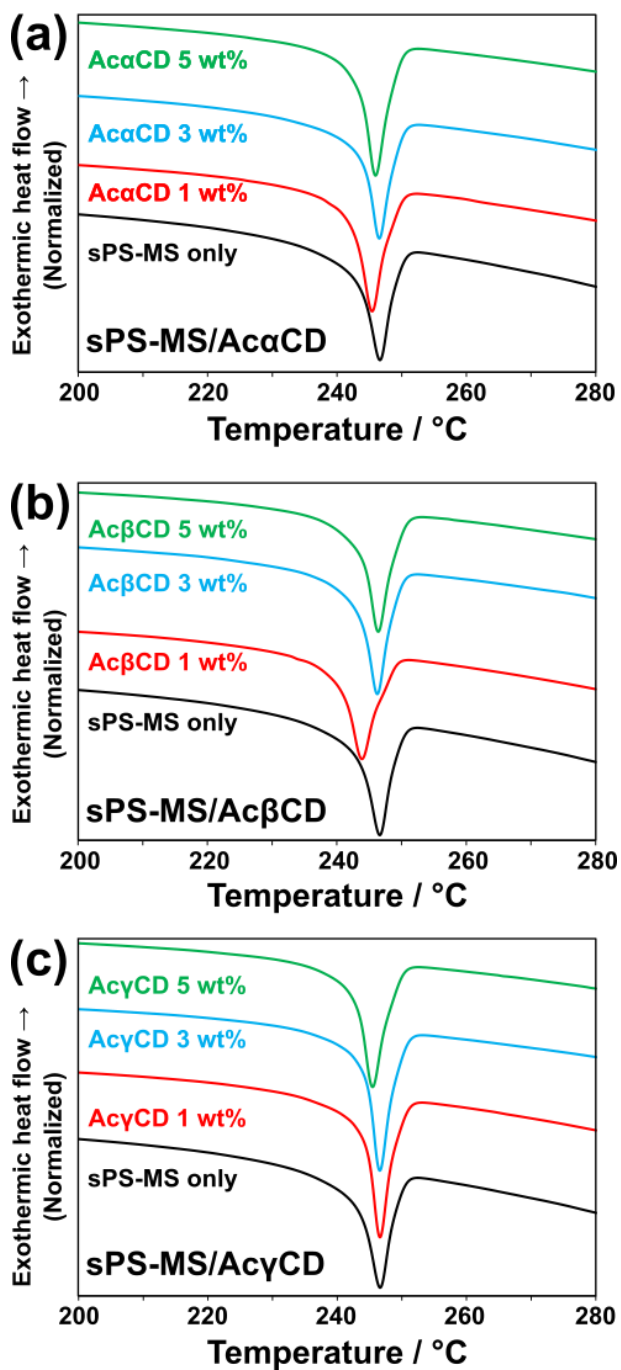

**Fig. S7.** DSC thermograms of the sPS-MS composites under the second scan with (a) Ac $\alpha$ CD, (b) Ac $\beta$ CD, and (c) Ac $\gamma$ CD.

## References

- 1 J. Park, S. Murayama, M. Osaki, H. Yamaguchi, A. Harada, G. Matsuba and Y. Takashima, *Eur. Polym. J.*, 2020, **134**, 109807.
